# Supplementary material for: Spatial variability in tropospheric peroxyacetyl nitrate in the tropics from infrared satellite observations in 2005 and 2006
Source: Copernicus journal article supplement (doi:10.5194/acp-17-6341-2017), 2017-05-24
Supplement: Supplementary file 1 [file acp-17-6341-2017-supplement.pdf]

Supplement of Atmos. Chem. Phys., 17, 6341–6351, 2017  
<http://www.atmos-chem-phys.net/17/6341/2017/>  
doi:10.5194/acp-17-6341-2017-supplement  
© Author(s) 2017. CC Attribution 3.0 License.

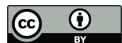

*Supplement of*

## **Spatial variability in tropospheric peroxyacetyl nitrate in the tropics from infrared satellite observations in 2005 and 2006**

**Vivienne H. Payne et al.**

*Correspondence to:* Vivienne H. Payne ([vivienne.h.payne@jpl.nasa.gov](mailto:vivienne.h.payne@jpl.nasa.gov))

The copyright of individual parts of the supplement might differ from the CC-BY 3.0 licence.

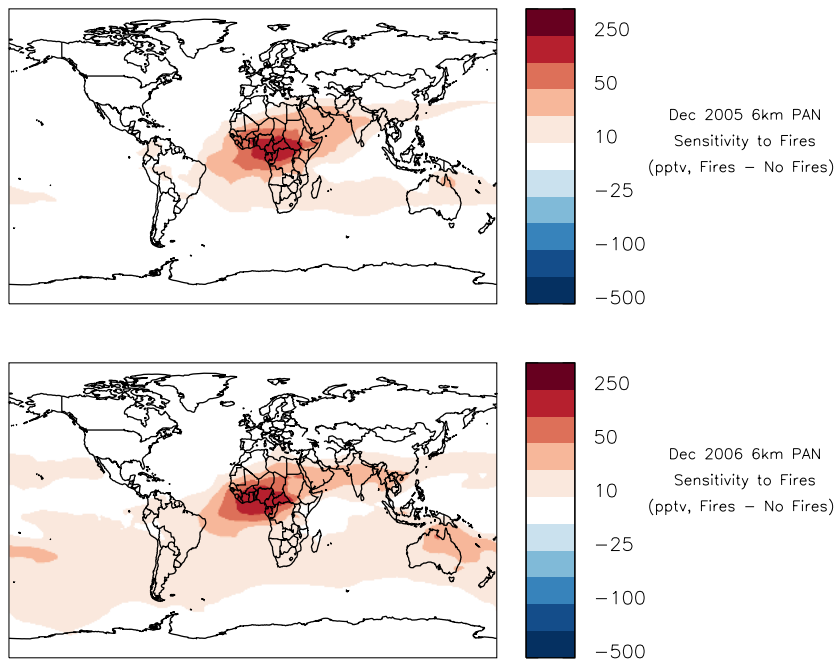

**Figure S1:** Sensitivity of PAN to emissions from biomass burning during December 2005 (top) and December 2006 (bottom) at 6 km calculated as the difference in PAN between a simulation with and without biomass burning emissions.

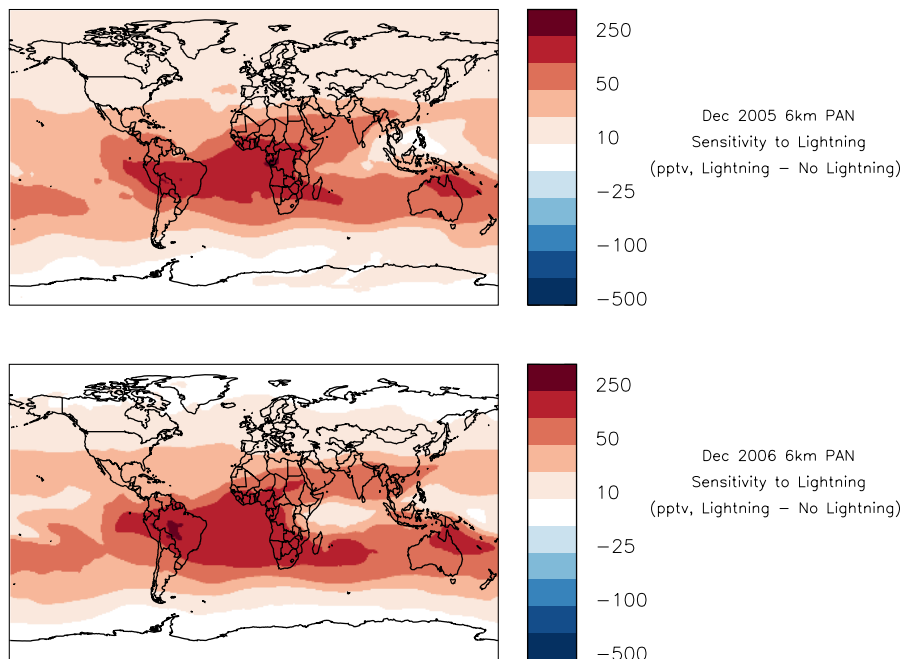

**Figure S2:** Sensitivity of PAN to emissions of lightning  $\text{NO}_x$  during December 2005 (top) and December 2006 (bottom) at 6 km calculated as the difference in PAN between a simulation with and without lightning  $\text{NO}_x$  emissions.
